# Supplementary material
Source: Springer Nature journal article supplement (https://www.springermedizin.de/resource/supplementary/12906_2013_2123_MOESM9_ESM.pdf/9523676)

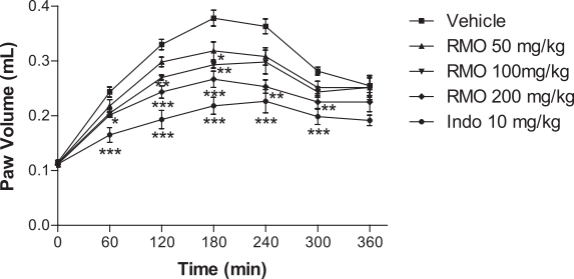

Supplement: MOESM9 [file 9523676]
